# Supplementary material for: Baclofen, a GABABR Agonist, Ameliorates Immune-Complex Mediated Acute Lung Injury by Modulating Pro-Inflammatory Mediators
Source: PLoS One. 2015 Apr 7;10(4):e0121637. doi: 10.1371/journal.pone.0121637 (PMC4388838; doi:10.1371/journal.pone.0121637)
Supplement: S11 Dataset — (XLSX) [file pone.0121637.s020.xlsx]

## Sheet: Sheet1
	GABABR2	GAPDH	B/C	AVG	SEM	TTEST				SEM
C	25318.1	50862.9	0.497771	0.585267	0.085			Control	0.58	0.085
C	24999	49696.7	0.503031					LI	0.22	0.007
C	25138.5	33296.1	0.754999					LI+B	0.39	0.011
LI	11799.7	55834.8	0.211333	0.221229	0.007	0.0129046
LI	12283.7	52335.2	0.234712
LI	11599.5	53296.1	0.217643
LI+B	17496	45313.3	0.386112	0.391494	0.011	0.000214962
LI+B	18169.7	43968.8	0.413241
LI+B	17059.5	45476.5	0.375129					Control	0.58	0.085
CGP+LI	5812.25	35024	0.16595	0.177306	0.01			LI	0.22	0.007
CGP+LI	6752.3	34232.7	0.197247					LI+B	0.39	0.011
CGP+LI	6501.25	38532.6	0.168721					CGP+LI	0.1773	0.01
CGP+LI+B	6355.37	35456.1	0.179246	0.187486	0.0099	0.000171977		CGP+LI+B	0.187	0.0099
CGP+LI+B	5842.03	33201.1	0.175959
CGP+LI+B	7505.05	36212.1	0.207252
ANOVA: Results
Source of Sum of d.f. Mean F
Variation Squares Squares
between 0.3686 4 9.2159E-02 20.26
error 4.5481E-02 10 4.5481E-03
total 0.4141 14
The probability of this result, assuming the null hypothesis, is less than .0001
Group A: Number of items= 3
0.498 0.503 0.755
Mean = 0.58527
95% confidence interval for Mean: 0.4985 thru 0.6720
Standard Deviation = 0.147
High = 0.7550 Low = 0.4978
Median = 0.5030
Average Absolute Deviation from Median = 8.574E-02
Group B: Number of items= 3
0.211 0.218 0.235
Mean = 0.22123
95% confidence interval for Mean: 0.1345 thru 0.3080
Standard Deviation = 1.210E-02
High = 0.2347 Low = 0.2113
Median = 0.2176
Average Absolute Deviation from Median = 7.793E-03
Group C: Number of items= 3
0.375 0.386 0.413
Mean = 0.39149
95% confidence interval for Mean: 0.3047 thru 0.4782
Standard Deviation = 1.962E-02
High = 0.4132 Low = 0.3751
Median = 0.3861
Average Absolute Deviation from Median = 1.270E-02
Group D: Number of items= 3
0.166 0.169 0.197
Mean = 0.17731
95% confidence interval for Mean: 9.0551E-02 thru 0.2641
Standard Deviation = 1.732E-02
High = 0.1972 Low = 0.1660
Median = 0.1687
Average Absolute Deviation from Median = 1.043E-02
Group E: Number of items= 3
0.176 0.179 0.207
Mean = 0.18749
95% confidence interval for Mean: 0.1007 thru 0.2742
Standard Deviation = 1.720E-02
High = 0.2073 Low = 0.1760
Median = 0.1792
Average Absolute Deviation from Median = 1.043E-02
